# Supplementary material for: 2’-Fucosyllactose Inhibits Coxsackievirus Class A Type 9 Infection by Blocking Virus Attachment and Internalisation
Source: MDPI journal article supplement (doi:10.3390/ijms232213727), 2022-11-08
Supplement: s1 [file s1]

# Supplementary Materials

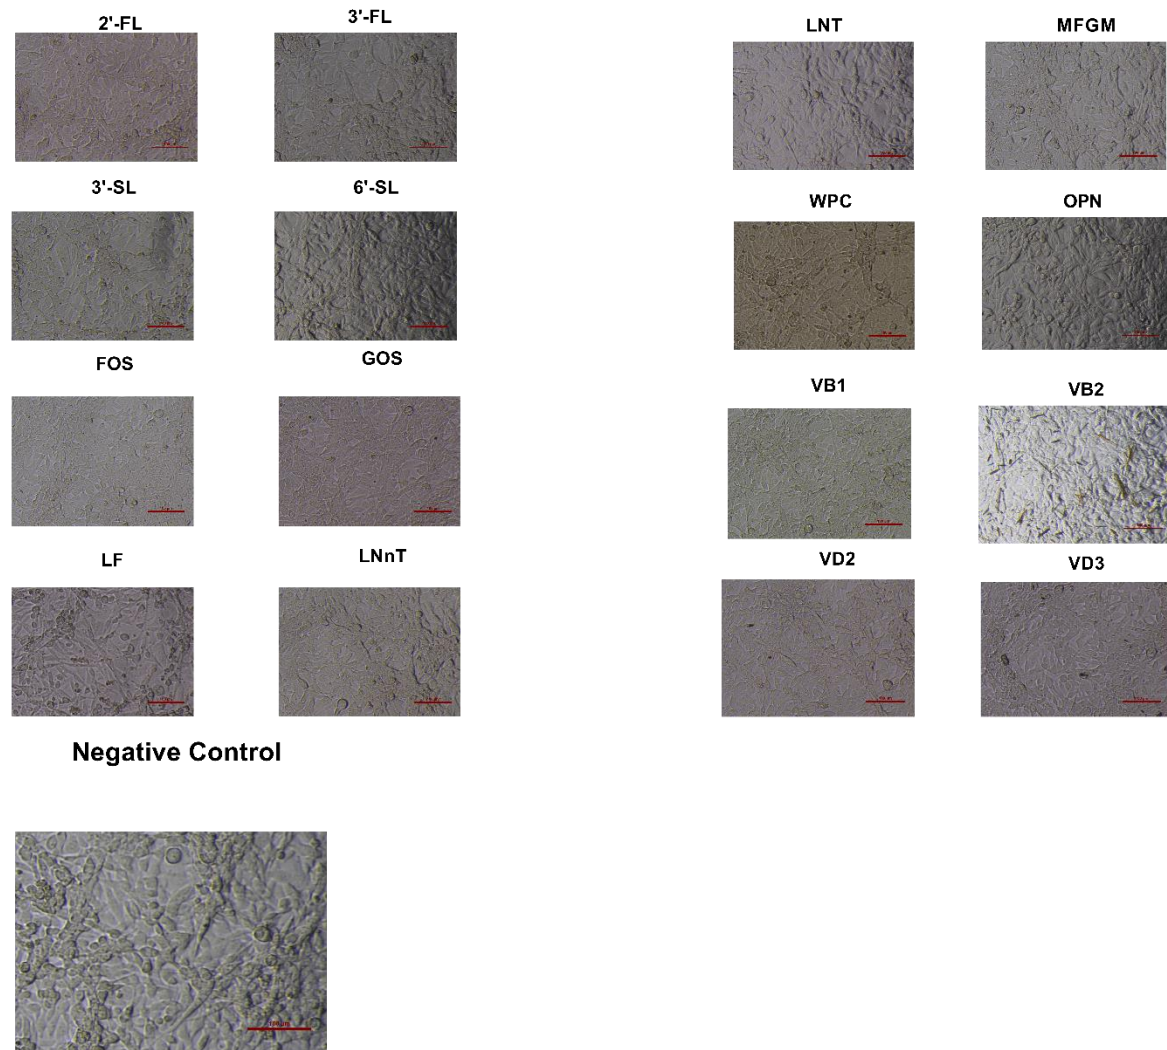

**Figure S1.** Cytoqram after treatment with 16 primary screening drugs. RD cells were seeded in 96-well plates. At 80%–90% cell density, various drugs (2'-FL [10 mg/mL], 3'-Fucosyllactose [10 mg/mL], lacto-N-Tetraose [10 mg/mL], lacto-N-Neotetraose [10 mg/mL], 3'-Sialyllactose [10 mg/mL], 6'-Sialyllactose [10 mg/mL], whey protein concentrate [5 mg/mL], milk fat globule membrane [5 mg/mL], LF [5 mg/mL], OPN [5 mg/mL], Vitamin B2 [100 ug/mL], Vitamin B1 [1 mg/mL], Vitamin D2 [1 mg/mL], and Vitamin D3 [1 mg/mL]) were added. At 48 h.p.i., Perform cytography to observe cytopathic lesions.

A

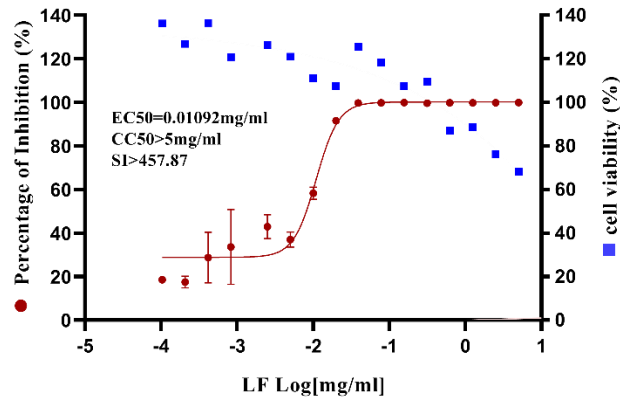

B

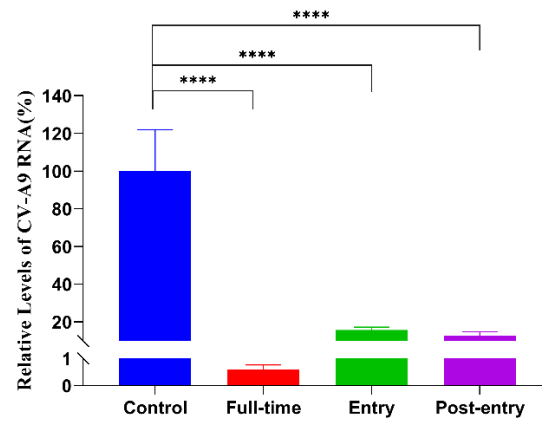

**Figure S2.** The anti-CV-A9 activity of lactoferrin (LF). **(A)** The anti-CV-A9  $EC_{50}$  and  $CC_{50}$  of LF on RD. Cells were infected with CV-A9 at MOI = 0.001 and treated with LF at various concentrations (from 5mg/ml to 0.0001 mg/mL) to determine viral inhibition and cell viability. Concentration of  $\geq 0.02$  mg/mL was able to inhibit CV-A9 infection. The left and right Y-axis represent mean percentage of inhibition of virus yield and cytotoxicity, respectively. **(B)** Time-of-addition experiment of LF (0.04 mg/mL). The detailed steps for time-of-addition experiment were described in the method section, and virus and GAPDH mRNA levels in the infected cell were quantified by qRT-PCR at 48h p.i. \*\*\*\* $p < 0.0001$ , Student's t-test compared to control.

A

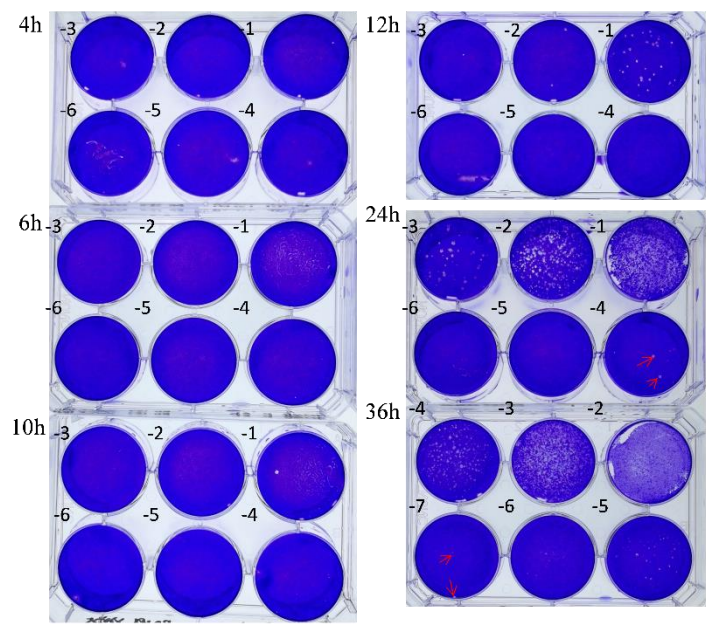

B

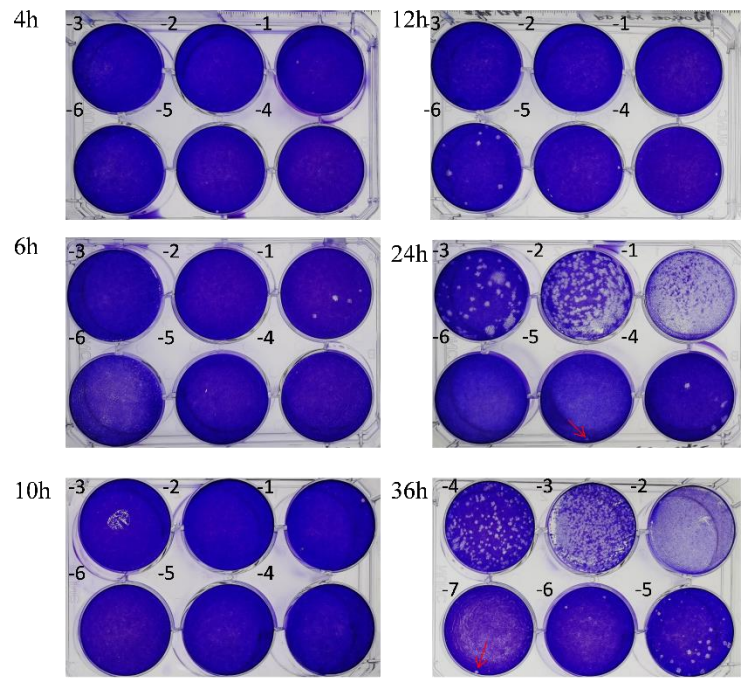

C

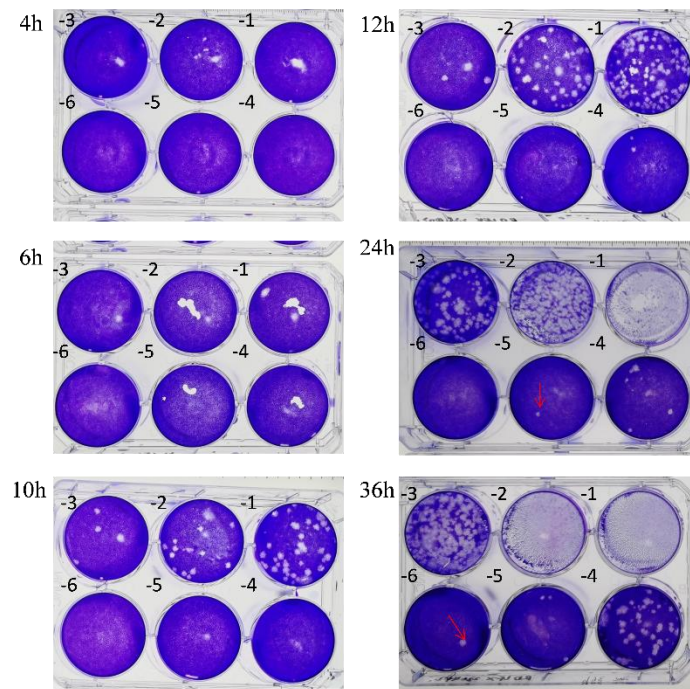

**Figure S3.** Plaque assay corresponding to the CV-A9 single-step growth curve in RD cells (A) without any drug treatment, (B) with a single dose of 2'FL (10 mg/ml) and (C) with a single dose of LF (0.04 mg/mL) treatment.
